# Supplementary material for: Correlated chromosomal periodicities according to the growth rate and gene expression
Source: PubMed Central journal article supplement (PMC7511328; doi:10.1038/s41598-020-72389-6), 2020-09-23
Supplement: 41598_2020_72389_MOESM1_ESM.pdf [file 41598_2020_72389_MOESM1_ESM.pdf]

## Supplemental figures and tables

### Correlated chromosomal periodicities according to the growth rate and gene expression

Liu Liu<sup>1,#</sup>, Masaomi Kurokawa<sup>1,#</sup>, Motoki Nagai<sup>1</sup>, Shigeto Seno<sup>2</sup>, Bei-Wen Ying<sup>1,\*</sup>

<sup>1</sup> Graduate School of Life and Environmental Sciences, University of Tsukuba, 1-1-1 Tennodai, Tsukuba, Ibaraki 305-8572, Japan

<sup>2</sup> Graduate School of Information Science and Technology, Osaka University, 1-5 Yamadaoka, Suita, Osaka 565-0871, Japan

# These authors contributed equally to the study.

\*Corresponding: [ying.beiwen.gf@u.tsukuba.ac.jp](mailto:ying.beiwen.gf@u.tsukuba.ac.jp) (BWY)

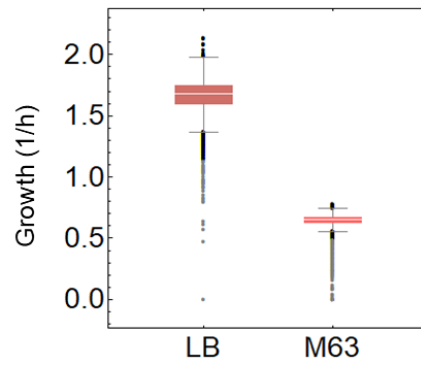

**Figure S1 Boxplots of the growth rates of the single-gene knockout strains.** The growth rates of a total of 3909 single-gene knockout strains grown in LB and M63 media are shown in the box-and-whisker plots. The outliers are indicated.

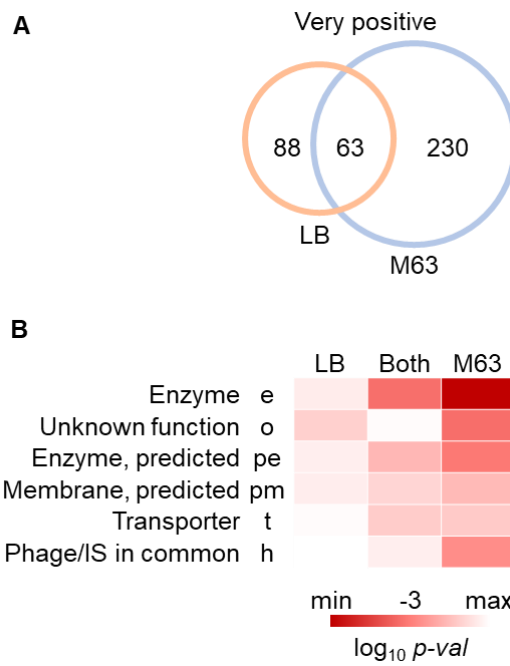

**Figure S2 Genes classified as very positive.** **A.** Venn diagram of the genes determined to have a very positive contribution to growth. The numbers of genes (strains) identified specifically and in common in cells grown in LB and M63 are indicated. **B.** Heatmap of the enriched gene categories of the genes determined to have a very positive contribution to growth. The gradation from light to dark indicates the statistical significance of the enrichment analysis from low to high, respectively.

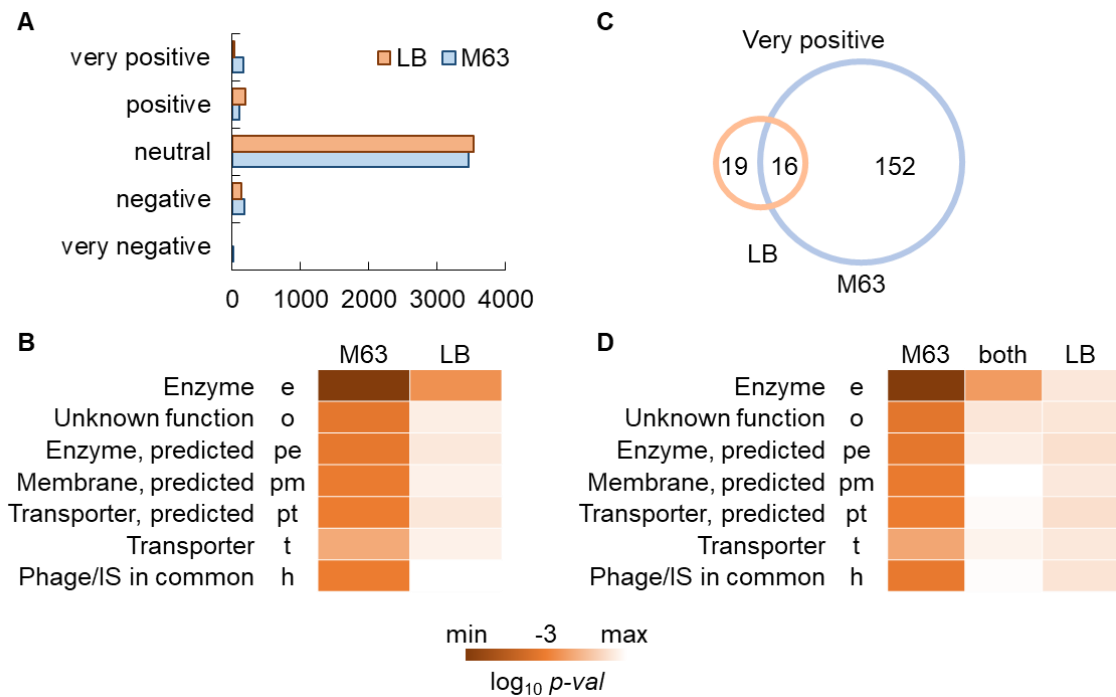

**Figure S3 Gene classification and functional enrichment.** **A.** Gene classification based on the growth rate with statistical re-evaluation. Five gene classes (very negative, negative, neutral, positive, and very positive) defined in the LB and M63 media are shown in orange and blue, respectively, as described in Fig. 1. The additional student t test (one-tailed) were performed to all strains, to evaluate whether the mean growth rate of each strain, which was assayed for three times, was statistically within the ranges of the outliers greater than the 1.5 interquartile range (IQR), from the 1.5 IQR to the upper quartile, from the upper to the lower quartiles, from the lower quartile to the 1.5 IQR, and within the ranges of outliers lower than 1.5 IQR, respectively. **B.** Heatmap of the enriched gene categories for the very positive class. The enriched gene categories, which were based on the critical benchmark, were as similar as those shown in Fig. 1C. The gradation from light to dark orange indicates the statistical significance of the enrichment analysis from low to high, respectively. **C.** Venn diagram of the genes determined to have a very positive contribution to growth. According to the critical benchmark, the numbers of genes (strains), identified specifically and in common in cells grown in LB and M63 are indicated. **D.** Heatmap of the enriched gene categories of the genes determined to have a very positive contribution to growth. The enriched gene categories, which were based on the critical benchmark, were as similar as those shown in Fig. S2B. The gradation from light to dark orange indicates the statistical significance of the enrichment analysis from low to high, respectively.

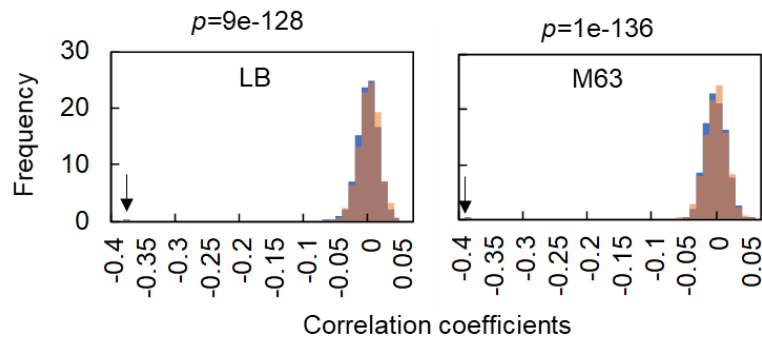

**Figure S4 Histograms of the simulated correlation coefficients.** The correlation coefficients were simulated by randomizing the values of either the growth rates or the gene expression 1,000 times. The 1,000 correlation coefficients for the randomized growth rates that were simulated and the randomized gene expression are shown in the histograms in blue and orange, respectively. The simulations were performed on the data sets acquired from cells grown in both LB (left) and M63 (right) media. The  $p$ -values of the correlation coefficients determined in the experiments in comparison to the simulations are indicated.

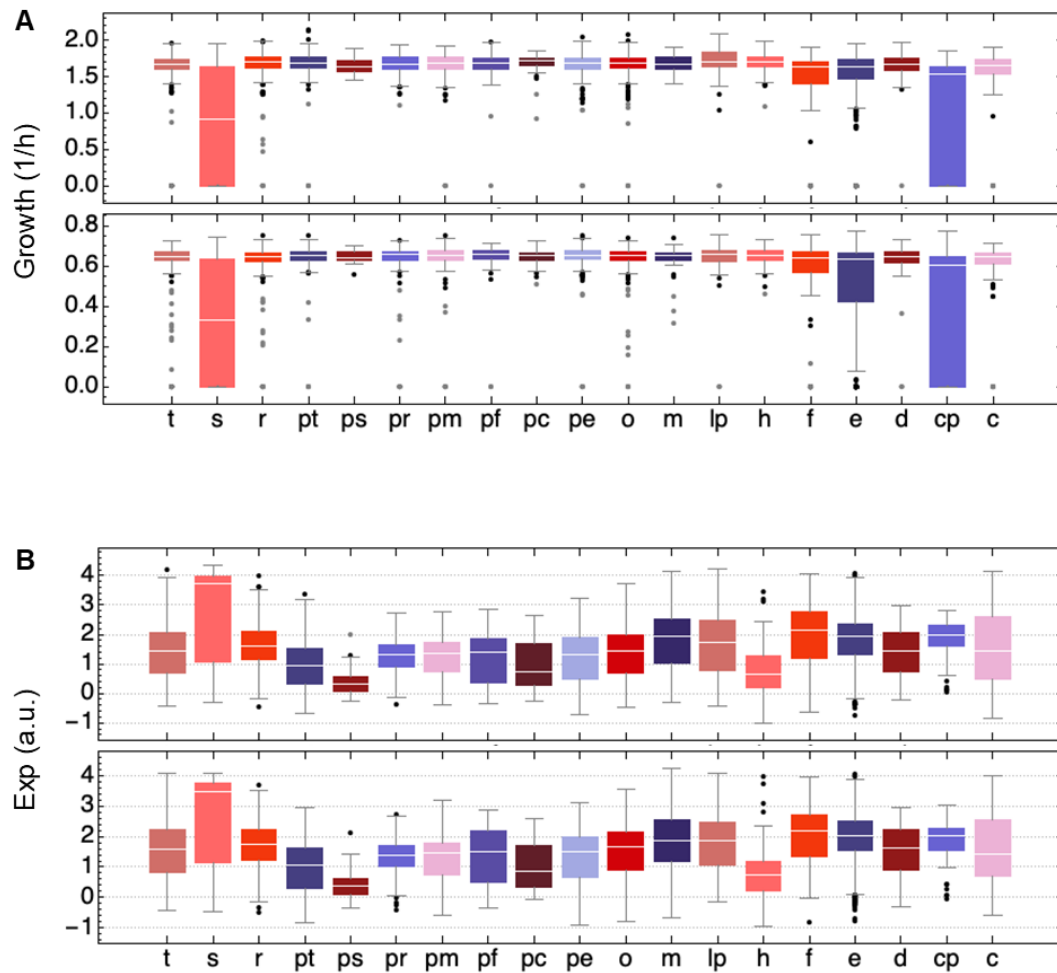

**Figure S5 Boxplots of the growth rates and gene expression at the gene category level.** The growth rates (A) and the expression levels ( $\log_{10}$ RPKM) (B) of the genes assigned to the same gene category are summarized in the box-and-whisker plots. The outliers are indicated. A total of 19 gene categories, which contain more than 30 genes, are shown. The gene categories are indicated as abbreviations.

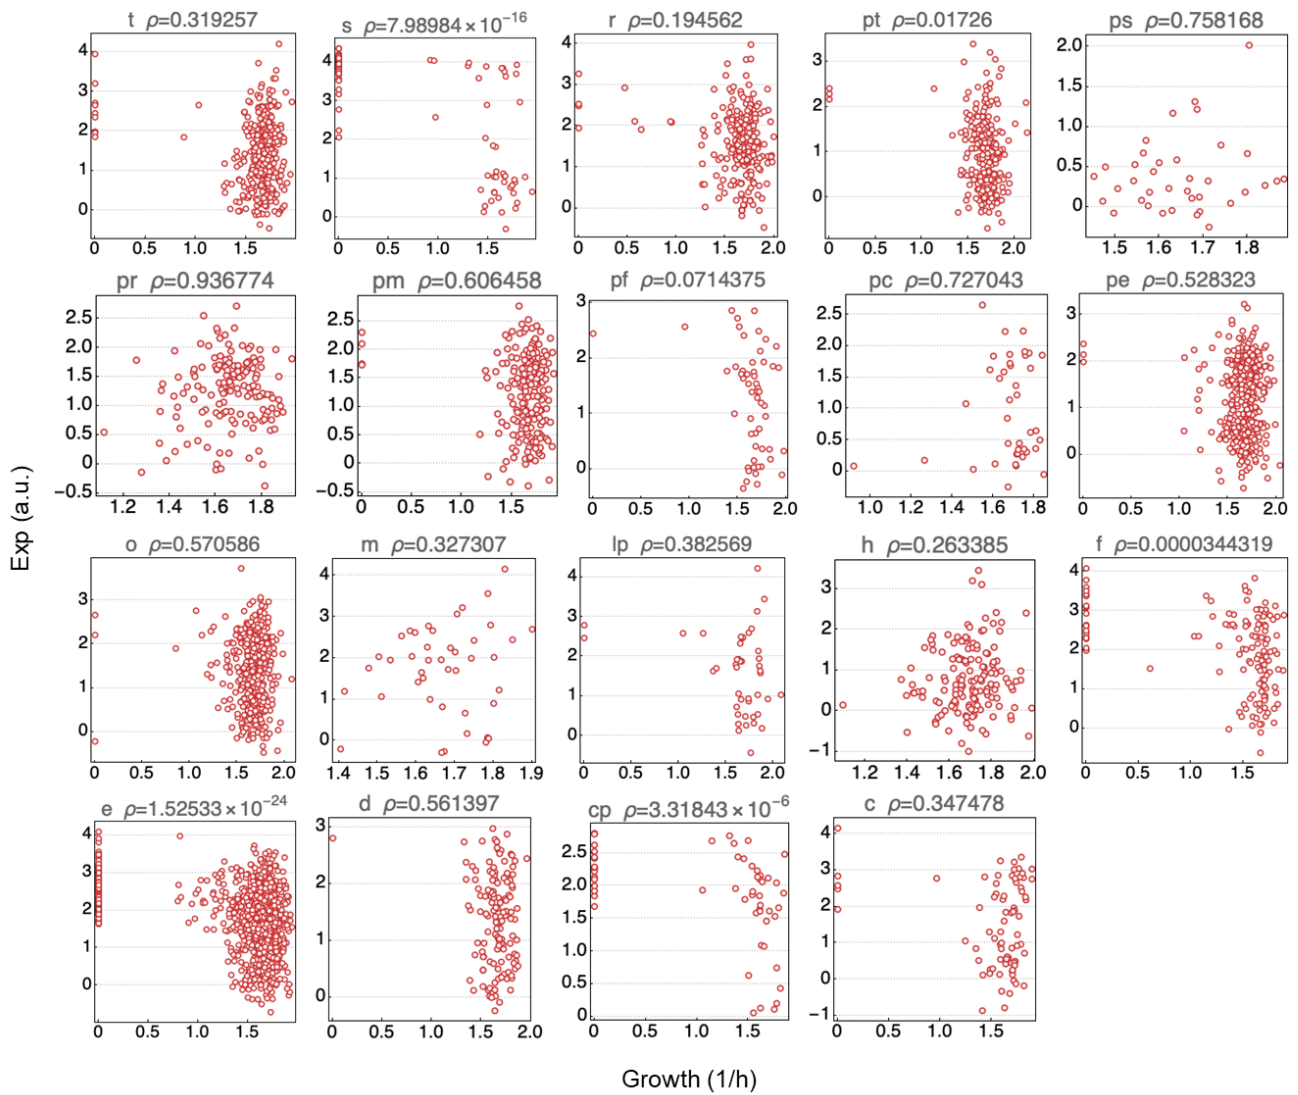

**Figure S6 Scatter plots of the growth rates and gene expression in LB within each gene category.**

The growth rates and the expression levels ( $\log_{10}$ RPKM) of the genes assigned to the corresponding gene categories are plotted. A total of 19 gene categories, which contain more than 30 genes, are shown.

The statistical significance of the Spearman correlation ( $\rho$ ) is indicated.

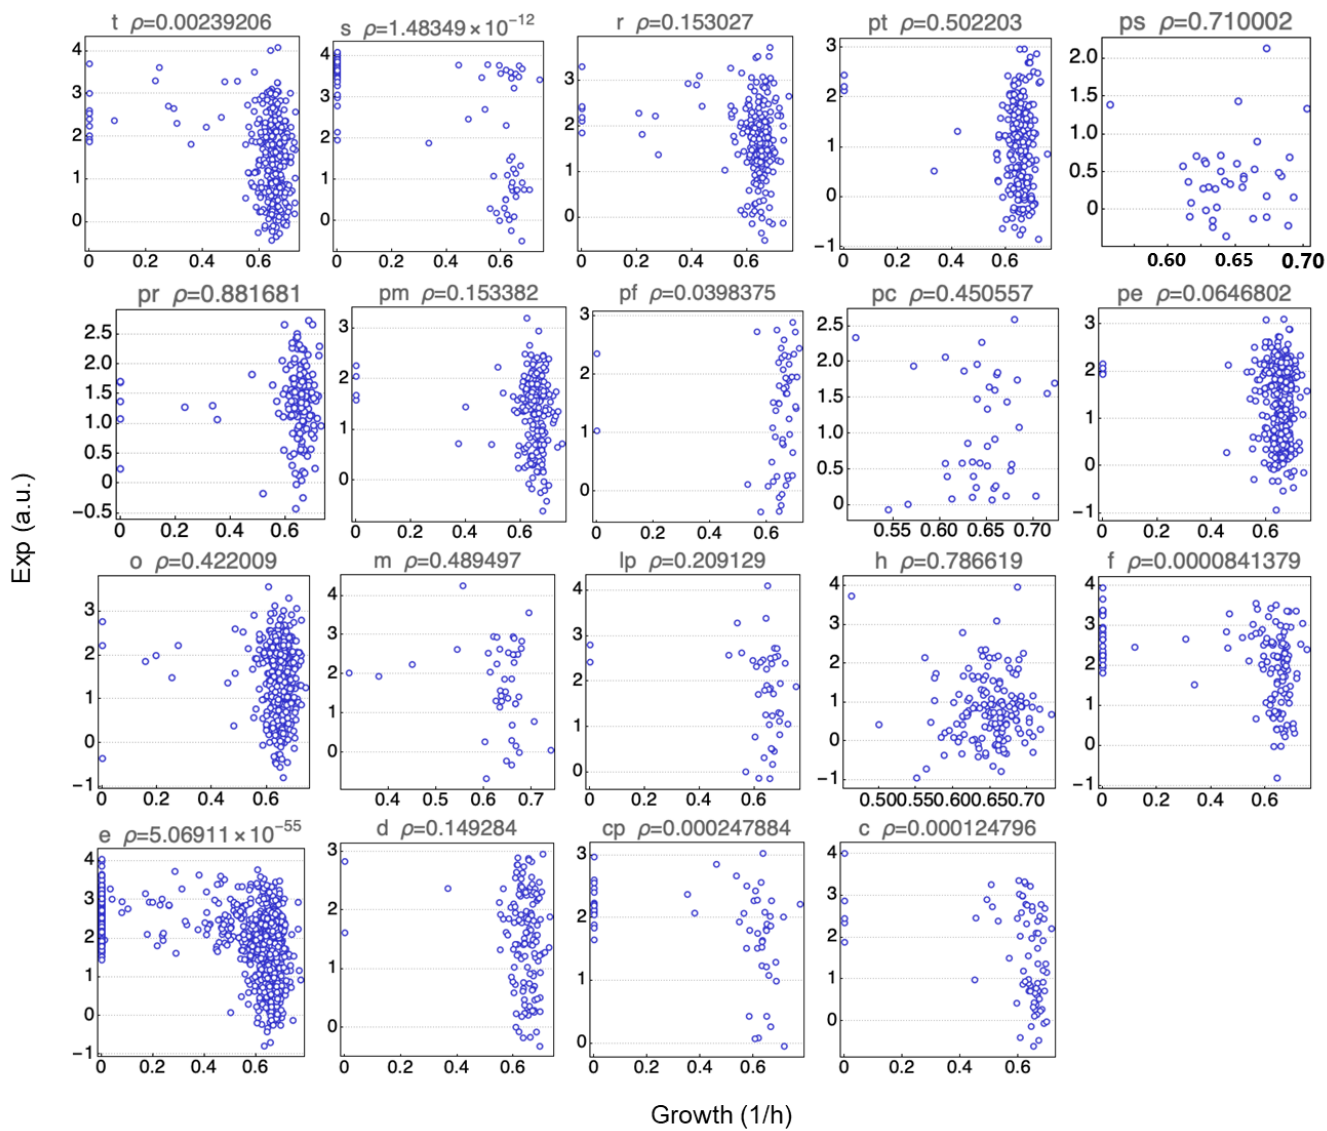

**Figure S7 Scatter plots of the growth rates and the gene expression in M63 within each gene category.** The growth rates and the expression levels ( $\log_{10}$ RPKM) of the genes assigned to the corresponding gene categories are plotted. A total of 19 gene categories, which contain more than 30 genes, are shown. The statistical significance of the Spearman correlation ( $\rho$ ) is indicated.



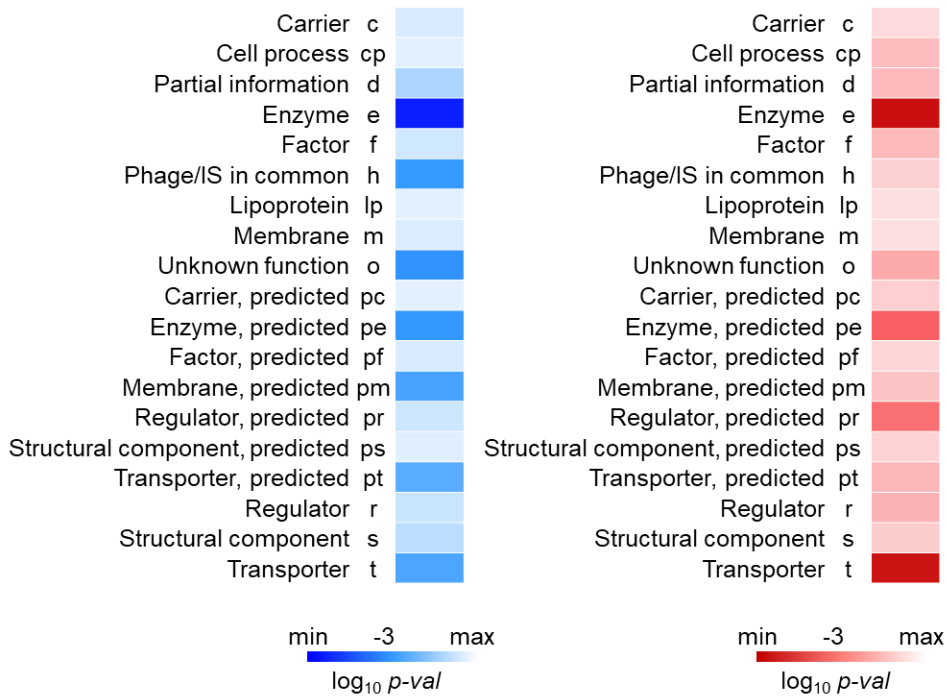

**Figure S8 Heatmaps of the enriched gene categories.** The full results of the gene category enrichment of DEGs and DGGs are shown in the right and left panels, respectively. The blue and red gradations from light to dark indicate the statistical significance of the enrichment analysis from low to high of the DGGs and DEGs, respectively.

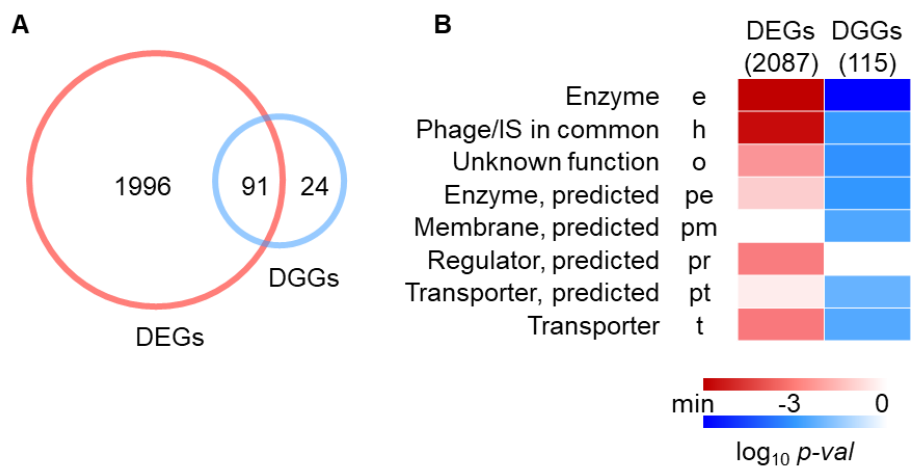

**Figure S9 Genes classified as very positive.** **A.** Venn diagram of DEGs and DGGs. The numbers of the genes specifically and commonly determined as DEGs and DGGs are indicated. The methods of DEseq2 and Rank product were used to determine DEGs and DGGs, respectively. **B.** Heatmap of the enriched gene categories of the genes determined to have a very positive contribution to growth. The gradation from light to dark indicates the statistical significance of the enrichment analysis from low to high, respectively.

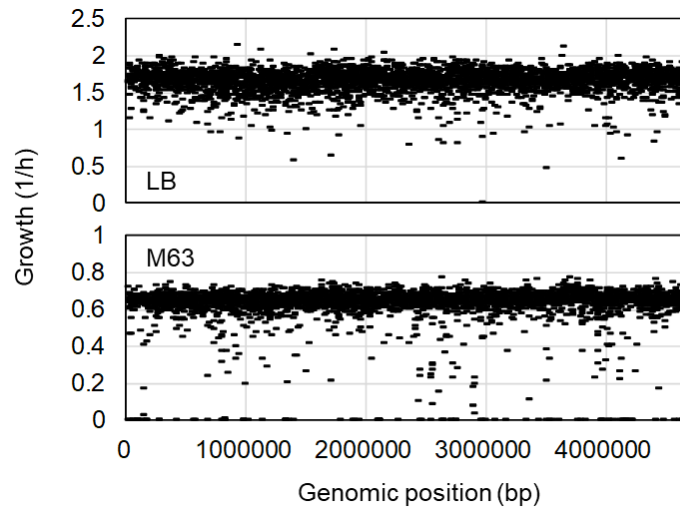

**Figure S10 Genomic views of the growth rates of the knockout strains.** The growth rates of the knockout strains are directly plotted against those of the wild-type genome BW25113 at the genomic positions of the corresponding missing genes. The upper and bottom panels present the growth rates in LB and M63 media, respectively.

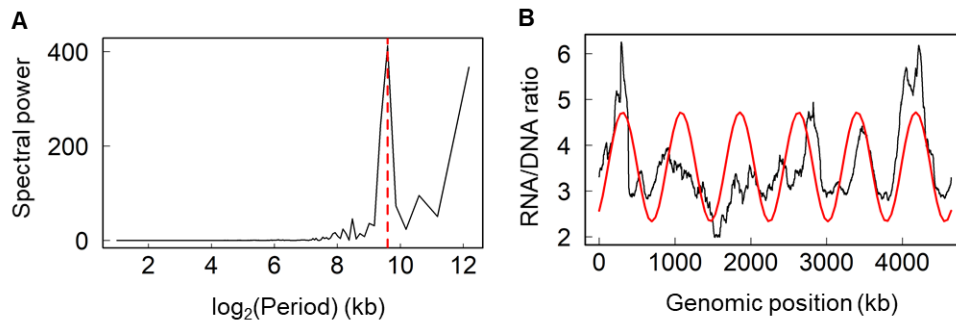

**Figure S11 Chromosomal periodicity of the gene-independent transcriptional propensity. A.** Spectral power of the Fourier-transformed transcriptional propensity. The major spectral power at a wavelength of 773.7 kb is indicated by the broken line in red. **B.** Periodogram of the transcriptional propensity. The periodicities of the highest spectral power (**A**, red lines) are shown in the curves in red. The data of transcriptional propensity was from the previous report<sup>32</sup>.

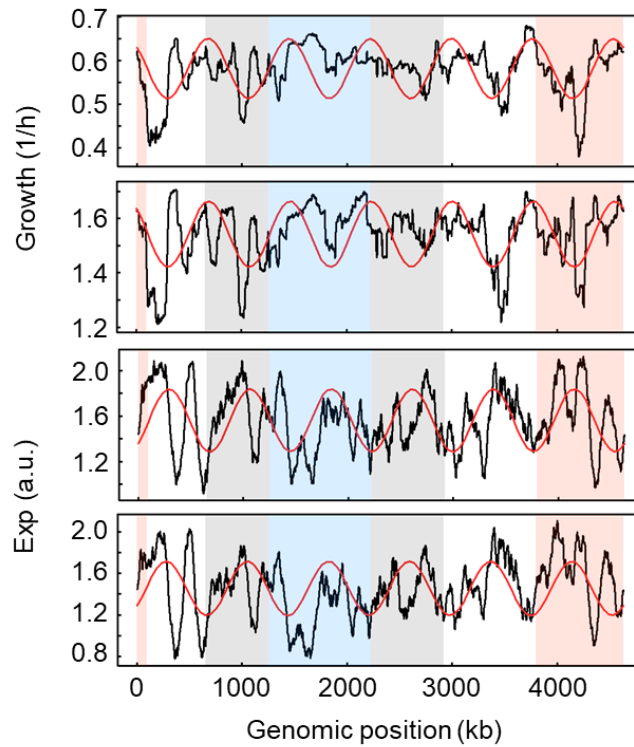

**Figure S12 Periodograms of the growth and gene expression associated with the macrodomain distribution.** The periodograms in Figure 5B and 5D associated with the chromosomal macrodomains are shown in the upper and bottom panels. The four structured macrodomains of *ori*, right, *ter*, left, are shown in pink, grey, blue and grey, respectively. The two non-structured regions at the right and left (NSR and NSL) are transparent.

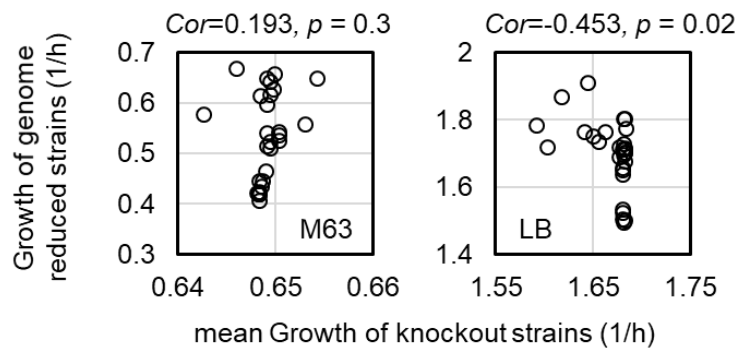

**Figure S13 Scatter plots of the mean growth rates of the genome-reduced and single-gene knockout strains.** The growth rates of 28 genome-reduced strains, which were constructed from wild-type *E. coli* W3110, were cited from our previous study. The growth rates of the knockout strains missing the genes located within the deleted regions of the reduced genomes were averaged. The growth assays of the genome-reduced strains and the single-gene knockout strains were performed by using the exactly same method. The left and right panels represent growth in M63 and LB media, respectively. The correlation coefficients and the statistical significance are indicated.

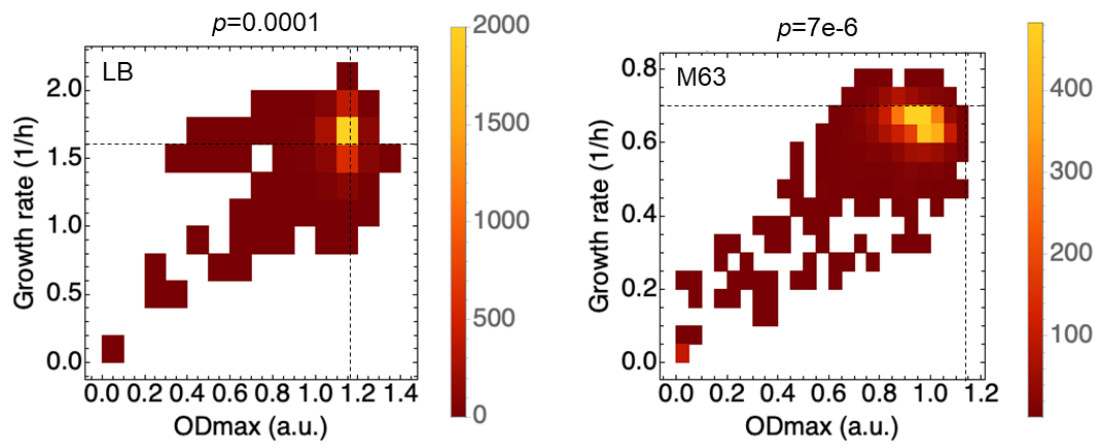

**Figure S14 Density histograms of the growth profiles of the Keio collection strains used in the present study.** The left and right panels present the growth profiles (N=3909) in LB and M63 media, respectively. The colour gradation from red to yellow indicates the number of strains from small to large. The statistical significance of the correlation is indicated. The growth rate and the maximal OD<sub>600</sub> of the wild-type strain are indicated by the broken lines.

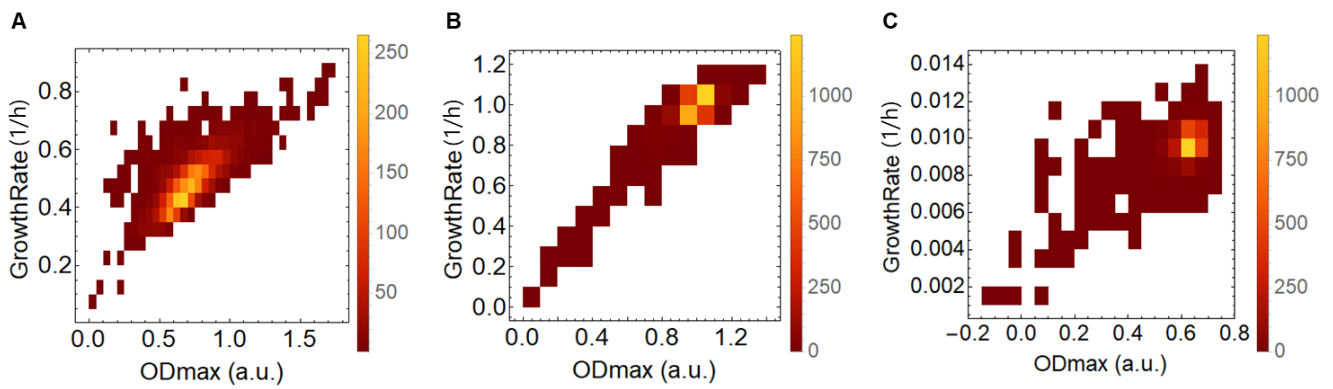

**Figure S15 Density histograms of the growth profiles of the Keio collection strains in other reports.** The data sets were obtained from previous studies reporting the growth profiles of the Keio collection strains. The growth assays were performed under the following conditions: **A.** M9 medium, 384-well (N=3907); **B.** LB agar medium, colony formation (N=3350); and **C.** M9 medium, single cell (N=3301). The relative values of the growth rates and the maximal population densities are shown. The colour gradation from red to yellow indicates the number of strains from small to large.



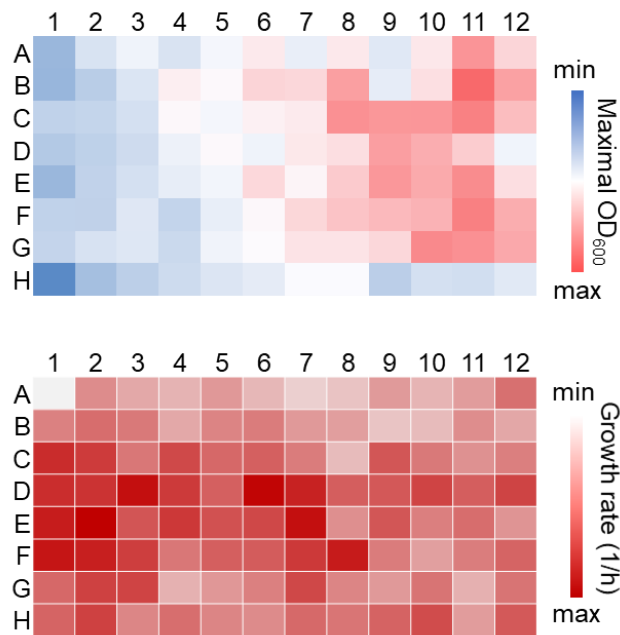

**Figure S16 Experimental bias in the growth assay.** The mean values of the maximal OD<sub>600</sub> (upper panel) and the growth rates (bottom panel) of the knockout strains assayed in the same well are shown in a 96-well microplate format. Each well contains more than 50 genotypes and hundreds of growth assays. The colour gradation indicates the mean values of the growth rates or the maximal OD<sub>600</sub> assayed in the individual wells.

**Table S1 Genes with a very negative contribution to growth fitness.** A total of 14 and 10 genes were determined to have a very negative contribution to growth in M63 and LB media, respectively. JWID, Genes, Growth, GC, ES and Function represent the ID number of the gene, the names of the missing genes, the growth rates of the knockout strains, the assigned gene category, the indicator of essentiality as reported by the constructors and the molecular function of the gene product, respectively.

| Media | JWID   | Genes | Growth/h | GC | ES   | function                                               |
|-------|--------|-------|----------|----|------|--------------------------------------------------------|
| M63   | JW0325 | prpD  | 0.745    | e  | -4   | 2-methylcitrate dehydratase                            |
|       | JW4286 | uxuB  | 0.748    | e  | -4   | D-mannonate oxidoreductase, NAD-binding                |
|       | JW1622 | rsxD  | 0.75     | pe | -3   | predicted inner membrane oxidoreductase                |
|       | JW5458 | ygeK  | 0.75     | pr | -2.5 | predicted DNA-binding transcriptional regulator        |
|       | JW3651 | yidG  | 0.753    | pm | -2   | predicted inner membrane protein                       |
|       | JW3148 | greA  | 0.753    | f  | -4   | transcription elongation factor                        |
|       | JW3474 | slp   | 0.753    | lp | -2   | outer membrane lipoprotein                             |
|       | JW2659 | mprA  | 0.753    | r  | -4   | DNA-binding transcriptional regulator                  |
|       | JW1527 | ydeE  | 0.755    | pt | -3   | predicted transporter                                  |
|       | JW5741 | rnr   | 0.765    | e  | -4   | exoribonuclease R, RNase R                             |
|       | JW3228 | dusB  | 0.765    | e  | -3   | tRNA-dihydrouridine synthase B                         |
|       | JW3561 | aldB  | 0.769    | e  | -3.5 | aldehyde dehydrogenase B                               |
|       | JW3499 | bcsZ  | 0.775    | e  | -3   | endo-1,4-D-glucanase                                   |
|       | JW5397 | hda   | 0.775    | cp | 0    | ATPase regulatory factor involved in DnaA inactivation |
| LB    | JW0229 | frsA  | 1.998    | r  | -3   | hydrolase, binds to enzyme IIA(Glc)                    |
|       | JW0858 | ybjE  | 2.138    | pt | -4   | predicted transporter                                  |
|       | JW1032 | ymdB  | 2.079    | o  | -3   | conserved protein                                      |
|       | JW1446 | yncD  | 2.009    | pt | -3   | predicted iron outer membrane transporter              |
|       | JW1631 | ydhA  | 2.083    | lp | -3.5 | predicted lipoprotein                                  |
|       | JW1940 | yodC  | 1.985    | o  | -2.5 | predicted protein                                      |
|       | JW2044 | wcaA  | 2.04     | pe | -4   | predicted glycosyl transferase                         |
|       | JW3454 | yhiI  | 2.126    | pt | -4   | predicted HlyD family secretion protein                |

|        |      |       |    |      |                                   |
|--------|------|-------|----|------|-----------------------------------|
| JW3869 | frvX | 1.992 | pe | -3.5 | predicted endo-1,4-beta-glucanase |
| JW5679 | rhsB | 1.99  | h  | -3   | rhsB element core protein RshB    |

**Table S2 Common genes between DEGs and DGGs.** A total of 29 genes that overlapped between the DEGs and DGGs are summarized. JWID, Genes, GC and Function represent the ID number of the gene, the names of the genes, the assigned gene category and the molecular function of the gene product, respectively. DEGs LB/M63 and DGGs LB/M63 indicate the comparison of the gene expression (DEGs) and the growth rates (DGGs) between cells grown in LB and M63 media, respectively.

| Genes | GC | DEGs<br>LB/M63 | DFGs<br>LB/M63 | JWID   | function                                                                           |
|-------|----|----------------|----------------|--------|------------------------------------------------------------------------------------|
| argA  | e  | low            | high           | JW2786 | fused acetylglutamate kinase homolog (inactive) -!- amino acid N-acetyltransferase |
| argB  | e  | low            | high           | JW5553 | acetylglutamate kinase                                                             |
| argC  | e  | low            | high           | JW3930 | N-acetyl-gamma-glutamylphosphate reductase, NAD(P)-binding                         |
| argG  | e  | low            | high           | JW3140 | argininosuccinate synthetase                                                       |
| argH  | e  | low            | high           | JW3932 | argininosuccinate lyase                                                            |
| bioB  | e  | low            | high           | JW0758 | biotin synthase                                                                    |
| bioC  | pe | low            | high           | JW0760 | predicted methltransferase, enzyme of biotin synthesis                             |
| bioD  | e  | low            | high           | JW0761 | dethiobiotin synthetase                                                            |
| cysC  | e  | low            | high           | JW2720 | adenosine 5'-phosphosulfate kinase                                                 |
| cysD  | e  | low            | high           | JW2722 | sulfate adenylyltransferase, subunit 2                                             |
| cysH  | e  | low            | high           | JW2732 | 3'-phosphoadenosine 5'-phosphosulfate reductase                                    |
| cysI  | e  | low            | high           | JW2733 | sulfite reductase, beta subunit, NAD(P)-binding                                    |
| cysN  | e  | low            | high           | JW2721 | sulfate adenylyltransferase, subunit 1                                             |
| cysW  | t  | low            | high           | JW2416 | sulfate/thiosulfate transporter subunit -!- membrane component of ABC superfamily  |
| hisC  | e  | low            | high           | JW2003 | histidinol-phosphate aminotransferase                                              |
| ilvC  | e  | low            | high           | JW3747 | ketol-acid reductoisomerase, NAD(P)-binding                                        |
| leuA  | e  | low            | high           | JW0073 | 2-isopropylmalate synthase                                                         |
| leuB  | e  | low            | high           | JW5807 | 3-isopropylmalate dehydrogenase                                                    |
| leuC  | e  | low            | high           | JW0071 | 3-isopropylmalate isomerase subunit, dehydratase component                         |
| leuD  | e  | low            | high           | JW0070 | 3-isopropylmalate isomerase subunit                                                |
| leuL  | l  | low            | high           | JW0074 | leu operon leader peptide                                                          |

|      |   |     |      |        |                                                                                                                    |
|------|---|-----|------|--------|--------------------------------------------------------------------------------------------------------------------|
| metA | e | low | high | JW3973 | homoserine transsuccinylase                                                                                        |
| metE | e | low | high | JW3805 | 5-methyltetrahydropteroyltriglutamate-homocysteine S-methyltransferase                                             |
| metF | e | low | high | JW3913 | 5,10-methylenetetrahydrofolate reductase                                                                           |
| serA | e | low | high | JW2880 | D-3-phosphoglycerate dehydrogenase                                                                                 |
| trpA | e | low | high | JW1252 | tryptophan synthase, alpha subunit                                                                                 |
| trpC | e | low | high | JW1254 | fused indole-3-glycerolphosphate synthetase - N-(5-phosphoribosyl)anthranilate isomerase                           |
| trpD | e | low | high | JW1255 | fused glutamine amidotransferase (component II) of anthranilate synthase - anthranilate phosphoribosyl transferase |
| trpE | e | low | high | JW1256 | component I of anthranilate synthase                                                                               |
